# Supplementary material for: Multipathway synergy promotes testicular transition from growth to spermatogenesis in early-puberty goats
Source: PubMed Central journal article supplement (PMC7249689; doi:10.1186/s12864-020-6767-x), 2020-05-25

A

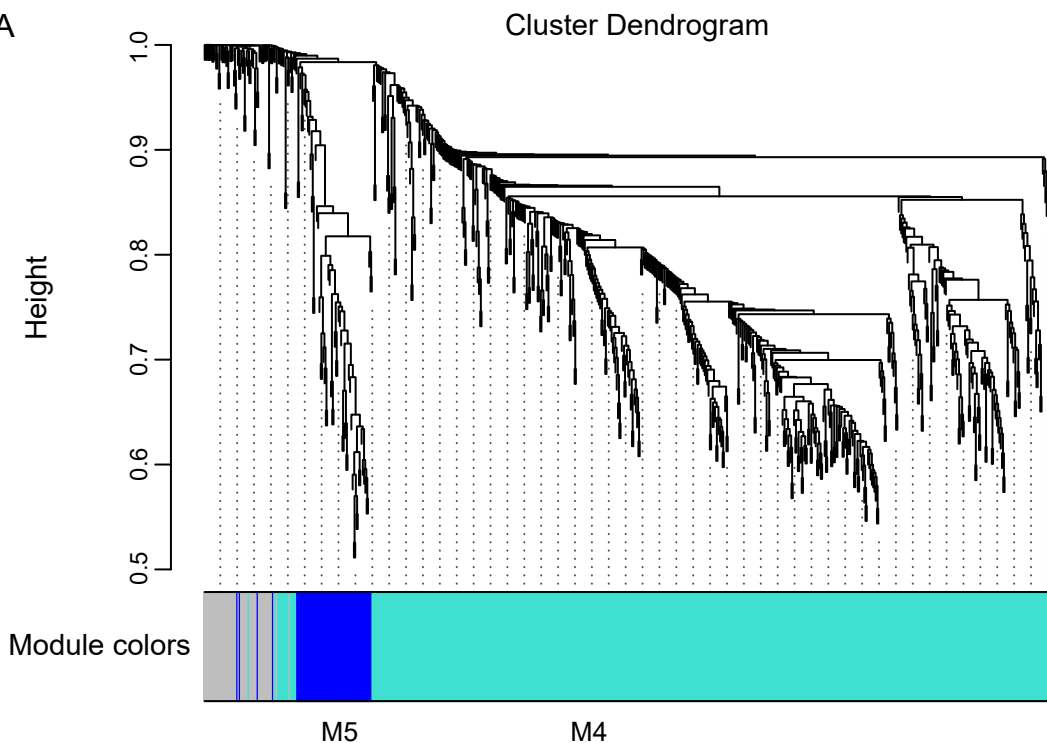

B

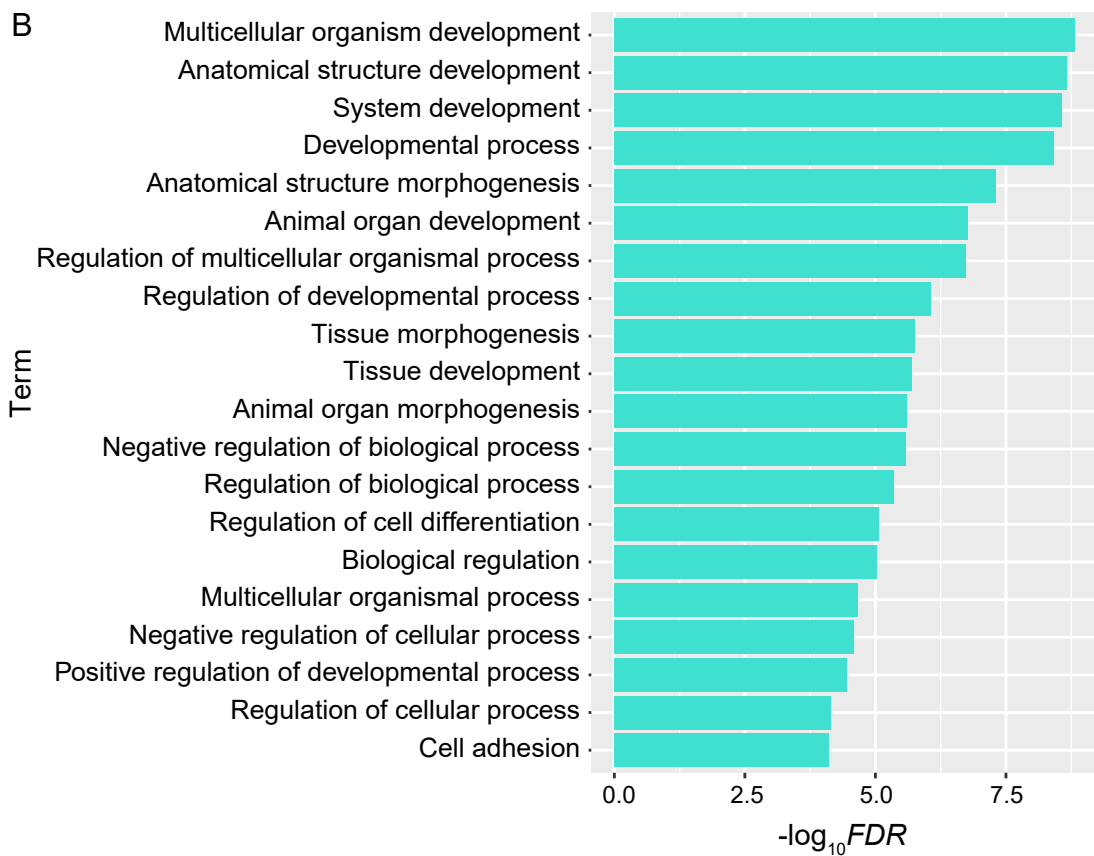

Supplement: 12864_2020_6767_MOESM3_ESM.pdf [file 12864_2020_6767_MOESM3_ESM.pdf]
